# Supplementary material for: Enhancing the Thermal Conductivity of CNT/AlN/Silicone Rubber Composites by Using CNTs Directly Grown on AlN to Achieve a Reduced Filler Filling Ratio
Source: MDPI journal article supplement (doi:10.3390/nano14060528), 2024-03-15
Supplement: s1 [file s1]

Supplementary Materials

# Enhancing the Thermal Conductivity of CNT/AlN/Silicone Rubber Composites by Using CNTs Directly Grown on AlN to Achieve a Reduced Filler Filling Ratio

Naoyuki Matsumoto \*, Don N. Futaba, Takeo Yamada and Ken Kokubo

Nano Carbon Device Research Center, National Institute of Advanced Industrial Science and Technology (AIST), Tsukuba Central 5, 1-1-1 Higashi, Tsukuba 305-8565, Ibaraki, Japan

\* Correspondence: matsumoto-naoyuki@aist.go.jp; Tel.: +81-29-861-4551

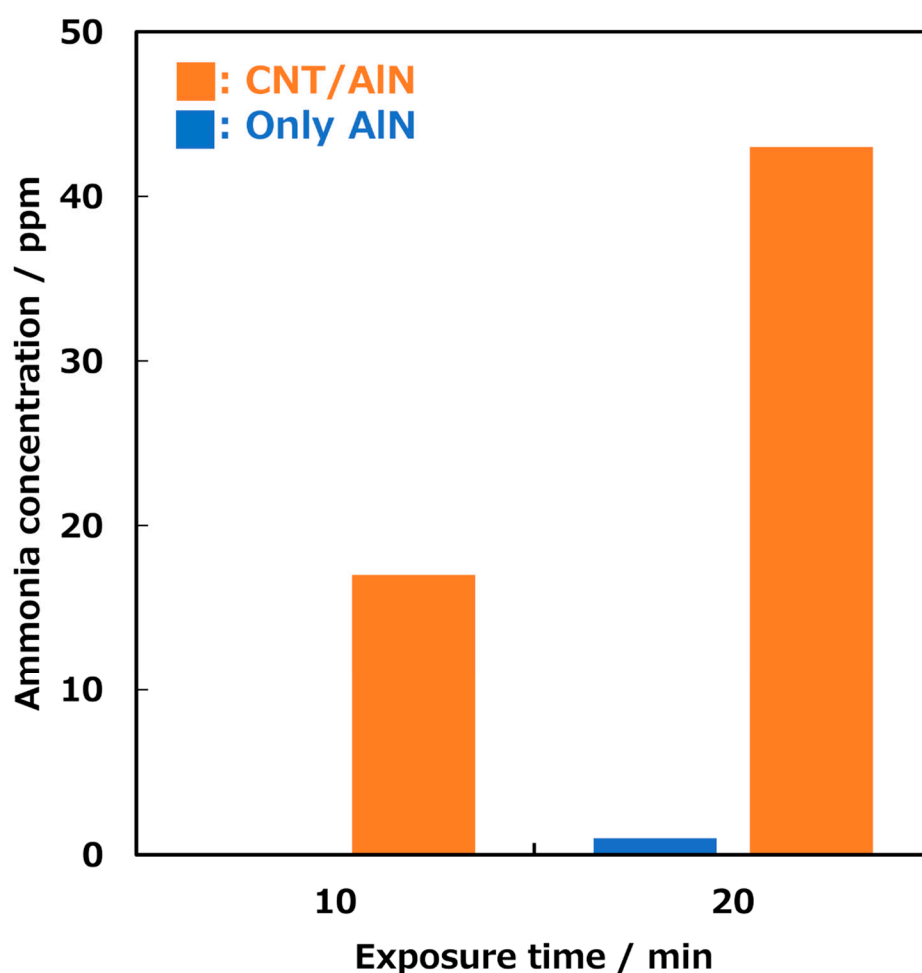

**Figure S1.** Variation in ammonia concentration in AlN or AlN/CNT composite filler as a function of time of atmospheric exposure (atmospheric exposure conditions: Temperature: 24.3 °C, Humidity: 75%).

**Table S1.** Amount of Fe catalyst on AlN and its standard deviation in X-ray fluorescence (XRF) measurement.

|                   | Fe content<br>( $\times 10^{-2}$ mass%) | Al content<br>(mass%) | Fe/Al ratio                |                          |
|-------------------|-----------------------------------------|-----------------------|----------------------------|--------------------------|
|                   |                                         |                       | Value ( $\times 10^{-3}$ ) | STD ( $\times 10^{-5}$ ) |
| Vacuum filtration | 2.42                                    | 10.6                  | 2.28                       | 2.80                     |
| Dip coating       | 2.51                                    | 12.4                  | 2.03                       | 9.82                     |
